# Supplementary material for: Mitochondrial PKM2 deacetylation by procyanidin B2-induced SIRT3 upregulation alleviates lung ischemia/reperfusion injury
Source: PubMed Central journal article supplement (PMC9276754; doi:10.1038/s41419-022-05051-w), 2022-07-11
Supplement: 41419_2022_5051_MOESM1_ESM.pdf [file 41419_2022_5051_MOESM1_ESM.pdf]

## Supplementary Figures

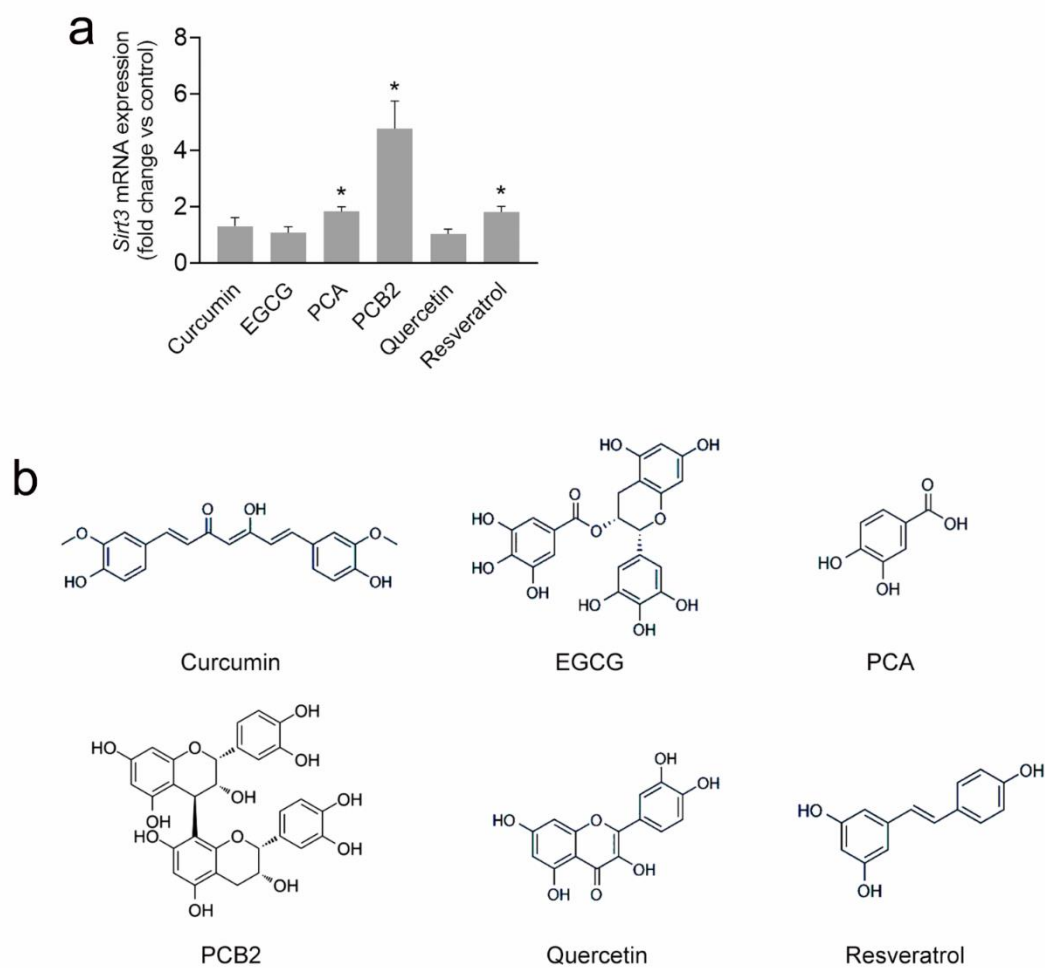

### Supplementary Fig. 1 PCB2 administration upregulates *Sirt3* mRNA expression.

PCB2 (30 mg/kg), curcumin (25 mg/kg), (-)-epigallocatechin gallate (EGCG, 85 mg/kg), protocatechuic acid (PCA, 30 mg/kg), quercetin (50 mg/kg), resveratrol (10 mg/kg) or vehicle was injected intraperitoneally into mice once a day for three consecutive days. (a) The fold change in *Sirt3* mRNA expression in the lung.  $n=3$ .  $*p<0.05$  compared with each of the vehicle controls. (b) Chemical structures of curcumin, EGCG, PCA, PCB2, quercetin and resveratrol.

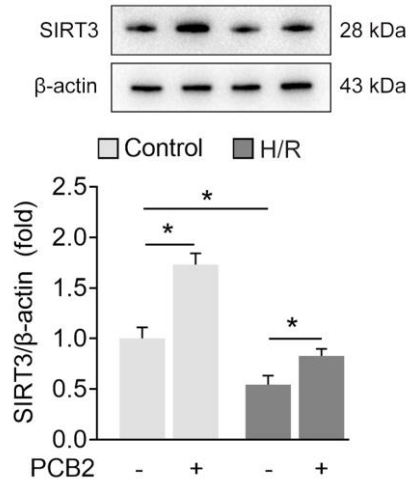

**Supplementary Fig. 2 PCB2 relieves H/R-induced SIRT3 suppression in A549 cells.**

A549 cells were treated with 20  $\mu$ M PCB2 for 24 h and then subjected to 6 h of hypoxia followed by 2 h of reoxygenation to induce H/R injury. The SIRT3 protein level in A549 cells is shown,  $n=3$ .

\* $p<0.05$ . Error bars depict the standard deviations.

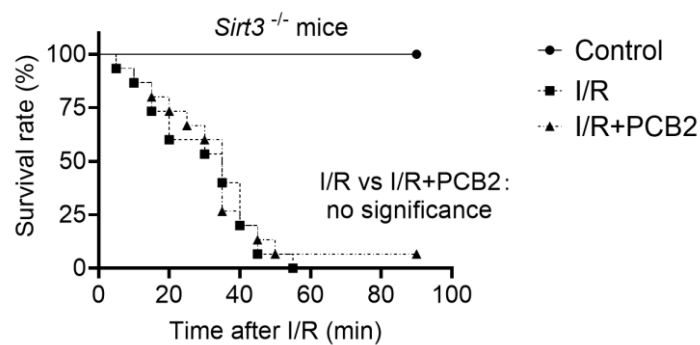

**Supplementary Fig. 3 PCB2 administration did not improve the survival rate of *Sirt3* knockout mice after lung I/R injury.**

*Sirt3* knockout mice were subjected to 1 h of ischemia followed by 2 h of reperfusion to induce lung I/R injury. Mice from the control group underwent sham surgical procedures. PCB2 (30 mg/kg) was injected intraperitoneally for three consecutive days before the operation. The survival rate of the mice is shown,  $n=15$ .

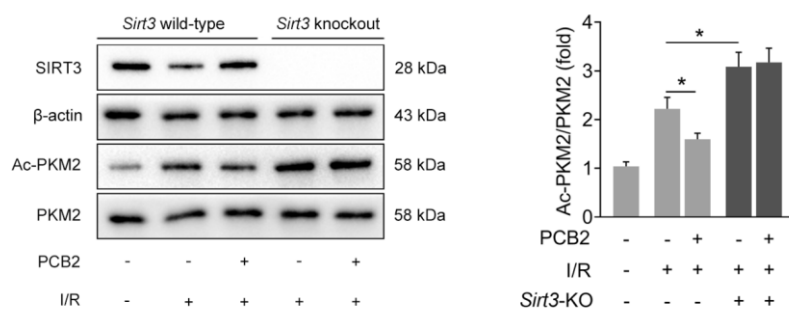

#### Supplementary Fig. 4 PCB2-induced PKM2 deacetylation depends on SIRT3 activation.

Mice were subjected to 1 h of ischemia followed by 2 h of reperfusion to induce lung I/R injury. Mice from the control group underwent sham surgical procedures. PCB2 (30 mg/kg) was injected intraperitoneally for three consecutive days before the operation. The level of the SIRT3 protein and the level of acetylated PKM2 in the lungs from *Sirt3* wild-type or *Sirt3* knockout mice are shown,  $n=3$ . Error bars depict the standard deviations.

#### Supplementary Table 1 Primer sequences

| Gene           | Forward primer (5'-3') | Reverse primer (5'-3') |
|----------------|------------------------|------------------------|
| <i>Sirt1</i>   | GCTGACGACTTCGACGACG    | TCGGTCAACAGGAGGTTGTCT  |
| <i>Sirt2</i>   | GCCTGGGTTCCTCCAAAAGGAG | GAGCGGAAGTCAGGGATAACC  |
| <i>Sirt3</i>   | ATCCCGGACTTCAGATCCCC   | CAACATGAAAAAGGGCTTGGG  |
| <i>Sirt4</i>   | GGCGACGTGTTCTCCTCACTG  | ACAAAGTCAACCTTGTCTGGG  |
| <i>Sirt5</i>   | CTCCGGGCCGATTCATTTCC   | GCGTTCGCAAAACACTTCCG   |
| <i>Sirt6</i>   | ATGTCGGTGAATTATGCAGCA  | GCTGGAGGACTGCCACATTA   |
| <i>Sirt7</i>   | AGCATCACCCGTTTGCATGA   | GGCAGTACGCTCAGTCACAT   |
| <i>β-actin</i> | AGAGGGAAATCGTGCGTGAC   | AGAGGGAAATCGTGCGTGAC   |
